# Supplementary material
Source: MDPI journal article supplement (https://www.mdpi.com/2072-666X/5/2/289)
Supplement: s2 [file s2]

**Supplementary Information**

**Video 1.** Real-time fluid flow in a circular microchannel (100 µm depth, 300 µm width). Flow was visualized *in situ* via fluorescent microscopy using fluorescent polystyrene tracking particles. Initially, the fluid was nearly motionless. About 3 s after the movie begins, an oscillating, directional flow to the right is observed upon starting pin actuation. About 30 s after starting the movie, the flow is stopped by finishing pin actuation.

© 2014 by the authors; licensee MDPI, Basel, Switzerland. This article is an open access article distributed under the terms and conditions of the Creative Commons Attribution license (http://creativecommons.org/licenses/by/3.0/).
